# Supplementary material for: Lithiophilicity chemistry of heteroatom-doped carbon to guide uniform lithium nucleation in lithium metal anodes
Source: PubMed Central journal article supplement — Sci Adv. 2019 Feb 15;5(2):eaau7728. doi: 10.1126/sciadv.aau7728 (PMC6377277; doi:10.1126/sciadv.aau7728), 2019-02-15
Supplement: aau7728_SM.pdf [file aau7728_SM.pdf]

## Supplementary Materials for

### Lithiophilicity chemistry of heteroatom-doped carbon to guide uniform lithium nucleation in lithium metal anodes

Xiang Chen, Xiao-Ru Chen, Ting-Zheng Hou, Bo-Quan Li, Xin-Bing Cheng, Rui Zhang, Qiang Zhang\*

\*Corresponding author. Email: zhang-qiang@mails.tsinghua.edu.cn

Published 15 February 2019, *Sci. Adv.* **5**, eaau7728 (2019)

DOI: 10.1126/sciadv.aau7728

#### This PDF file includes:

- Fig. S1. Schematic representation of the Li nucleation on conductive frameworks based on the classical heterogeneous nucleation model.
- Fig. S2. Periodic calculation method test.
- Fig. S3. The optimized configuration of carbons with bgB, egB, and oB dopant.
- Fig. S4. The optimized configuration of carbons with bqN, eqN, pN, and rN dopant.
- Fig. S5. The optimized configuration of carbons with aO, cO, eO, hO, and kO dopant.
- Fig. S6. The optimized configuration of carbons with F, Cl, Br, and I dopant.
- Fig. S7. The optimized configuration of carbons with P, oS, and S dopant.
- Fig. S8. The optimized configuration of carbons with C5, C7, and C5+C7 defects.
- Fig. S9. The optimized crystal structures of Li<sub>2</sub>O and Li<sub>3</sub>N.
- Fig. S10. The Bader charge analyses of bgB- and egB-GNRs.
- Fig. S11. The optimized interaction geometry of a Li atom interacts with eO-GNR.
- Fig. S12. The optimized structures and binding energies between a Li atom and a solvent molecule.
- Fig. S13. The optimized structures and binding energies between a Li atom and a multisolvent molecule.
- Fig. S14. The optimized structures of borabenzene, pyridine, pyrrole, benzoic acid, furan, phenol, quinomethan, thiophene, fluorobenzene, chlorobenzene, and bromobenzene molecules.
- Fig. S15. The optimized interaction geometries of Li<sup>+</sup>-DME complex and borabenzene, pyridine, pyrrole, benzoic acid, furan, phenol, quinomethan, thiophene, fluorobenzene, chlorobenzene, and bromobenzene molecules.
- Fig. S16. The optimized interaction geometry of a Li atom and single-/multilayered graphene and graphite.
- Fig. S17. A summary of calculated binding energy between a Li atom and single-/multilayered graphene and graphite.
- Fig. S18. The Li nucleation overpotentials on G, NG, and OG electrodes at different current densities (0.05, 0.50, and 1.00 mA cm<sup>-2</sup>).
- Fig. S19. The N<sub>2</sub> isotherms of OG, NG, and G materials.

Fig. S20. The pore size distribution derived from the  $N_2$  isothermal adsorption plot of OG, NG, and G materials.

Fig. S21. The Raman spectra of OG, NG, and G materials.

Fig. S22. The optimized interaction geometry of Li atom on GNR with C5, C7, and C5+C7 defects.

Fig. S23. The summary of binding energy of a Li atom adsorbed on GNR with C5, C7, and C5 + C7 defects.

Table S1. A summary of binding energy between nanoribbons and a Li atom.

Table S2. A summary of Li binding energy on Li (100) and (110) surfaces and total energy per bulk lithium.

Table S3. A summary of local dipole in heteroatom-doped nanoribbons.

## Supplementary Materials

### 1. Supplementary Figures

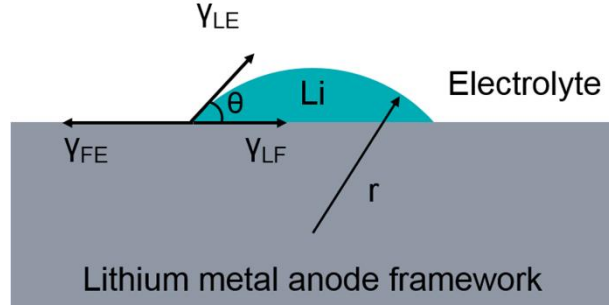

**Fig. S1. Schematic representation of the Li nucleation on conductive frameworks based on the classical heterogeneous nucleation model.**

According to classical heterogeneous nucleation theory, the critical nucleation radius ( $r^*$ ) is determined by

$$r^* = 2\gamma_{LE} / \Delta G_V \quad (S1)$$

where  $\Delta G_V$  is the free energy change of lithium from electrolyte to anode and  $\gamma_{LE}$  is lithium/electrolyte interfacial free energy. The critical nucleation radius ( $r^*$ ) is unaffected by the anode framework. However, the volume of nucleated lithium to reach  $r^*$  is much smaller than that in homogeneous nucleation, indicating the important role of anode framework in regulating Li nucleation.

More importantly, the anode framework can regulate the heterogeneous nucleation barrier

$$\Delta G_{het}^* = S(\theta)\Delta G_{hom}^* \quad (S2)$$

$$S(\theta) = (2 + \cos\theta)(1 - \cos\theta)^2 / 4 \quad (S3)$$

where  $\Delta G_{het}^*$  and  $\Delta G_{hom}^*$  are the heterogeneous and homogeneous nucleation barrier, respectively.

Considering the balance in the plane of the framework

$$\cos\theta = (\gamma_{FE} - \gamma_{LF}) / \gamma_{LE} \quad (S4)$$

When the binding energy between lithium and framework is increased,  $\gamma_{LF}$  is reduced. Therefore,  $\cos\theta$  is increased and  $S(\theta)$  as well as  $\Delta G_{het}^*$  is decreased.

In summary, a framework that can provide a large binding energy toward lithium can reduce the Li nucleation barrier as well as the volume of nucleated Li to reach  $r^*$ , favoring uniform Li deposition. The binding energy is thus a reasonable descriptor of the lithiophilicity of anode framework.

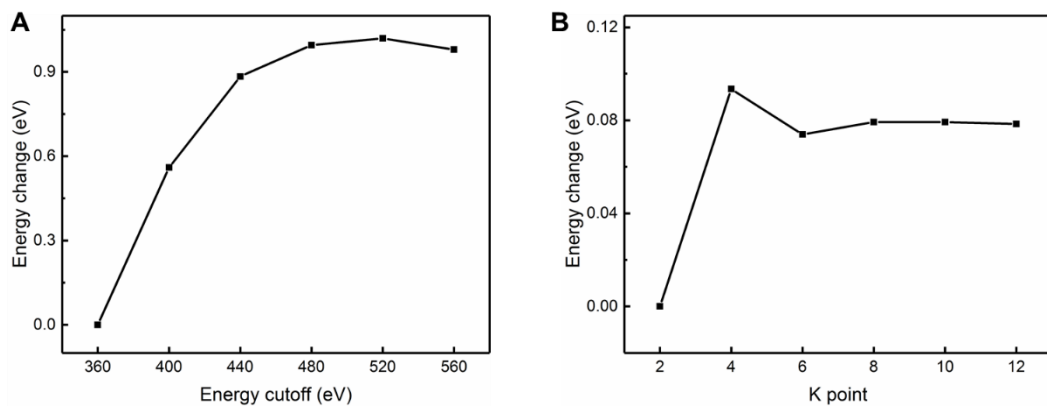

**Fig. S2. Periodic calculation method test. (A) Energy cutoff and (B) K point.**

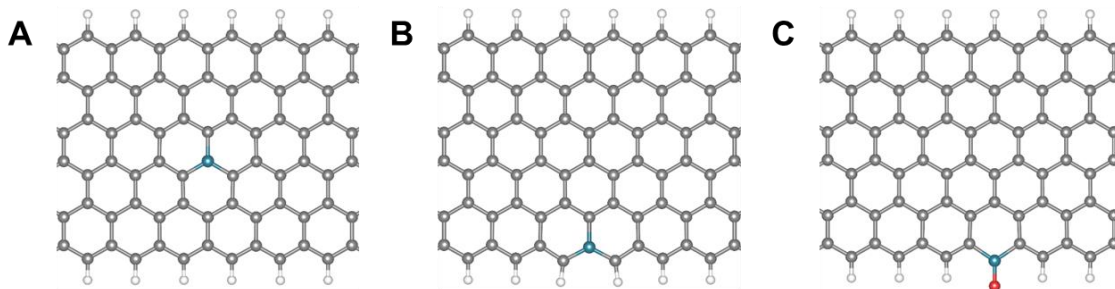

**Fig. S3. The optimized configuration of carbons with bgB, egB, and oB dopant.** The optimized configuration of carbons with (A) bgB, (B) egB, and (C) oB doping, respectively. The hydrogen, boron, carbon, and oxygen atoms are marked as white, green, gray, and red, respectively.

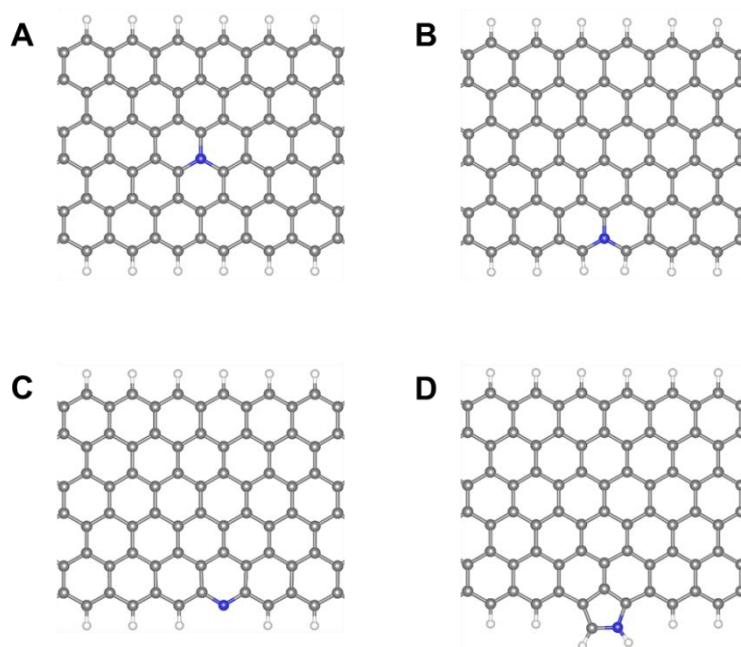

**Fig. S4. The optimized configuration of carbons with bqN, eqN, pN, and rN dopant.** The optimized configuration of carbons with (A) bqN, (B) eqN, (C) pN, and (D) rN doping, respectively. The hydrogen, nitrogen, and carbon atoms are marked as white, gray, and blue, respectively.

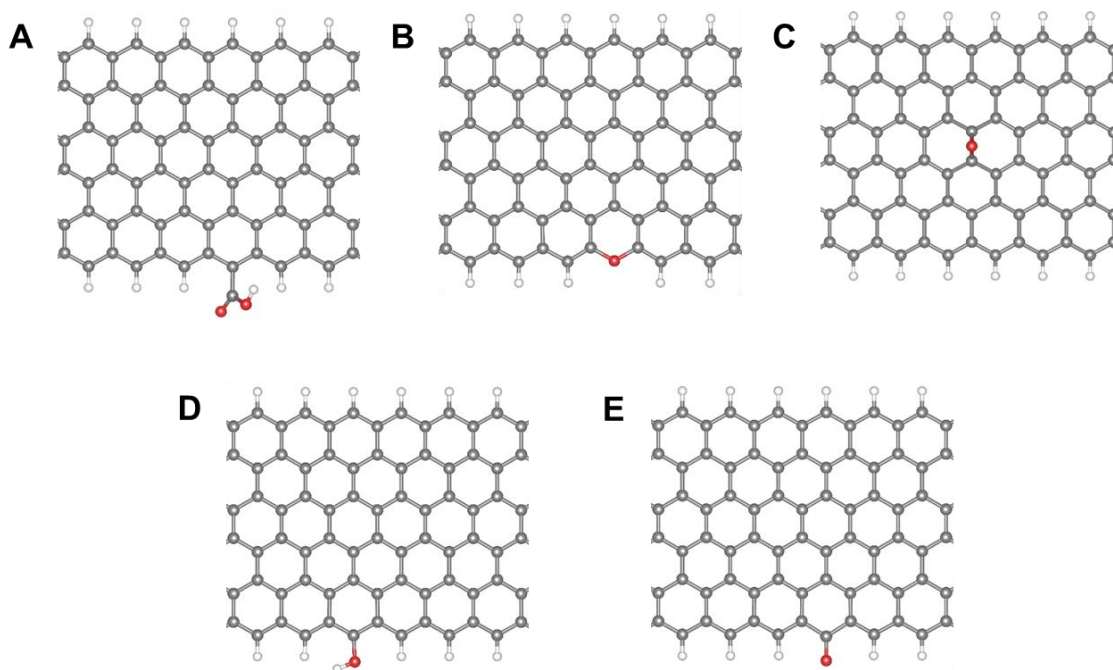

**Fig. S5. The optimized configuration of carbons with aO, cO, eO, hO, and kO dopant.** The optimized configuration of carbons with (A) aO, (B) cO, (C) eO, (D) hO, and (E) kO functional, respectively. The hydrogen, carbon, and oxygen atoms are marked as white, gray, and red, respectively.

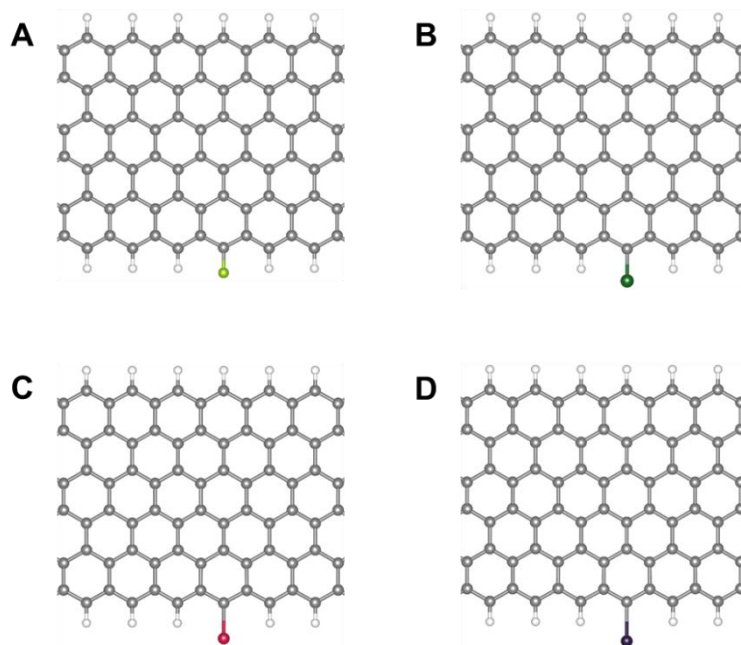

**Fig. S6. The optimized configuration of carbons with F, Cl, Br, and I dopant.** The optimized configuration of carbons with (A) F, (B) Cl, (C) Br, and (D) I doping, respectively. The hydrogen, carbon, fluorine, chlorine, bromine, and iodine atoms are marked as white, gray, cyan, bottle green, orange, and black, respectively.

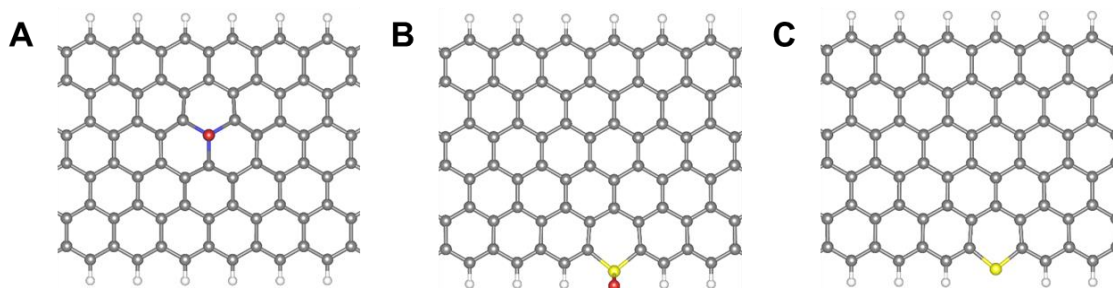

**Fig. S7. The optimized configuration of carbons with P, oS, and S dopant.** The optimized configuration of carbons with (A) P, (B) oS, and (C) S doping, respectively. The hydrogen, carbon, oxygen, phosphorus, and sulfur atoms are marked with white, gray, red, wathet, and yellow, respectively.

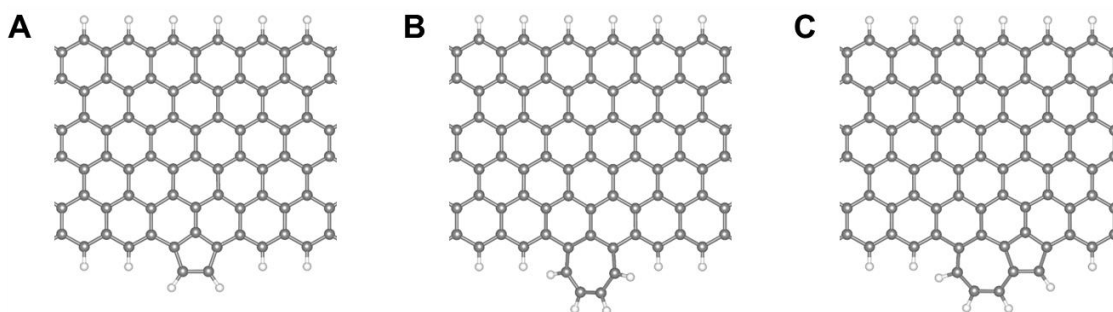

**Fig. S8. The optimized configuration of carbons with C5, C7, and C5+C7 defects.** The optimized configuration of carbons with (A) C5, (B) C7, and (C) C5+C7 defects, respectively. The hydrogen and carbon atoms are marked with white and gray, respectively

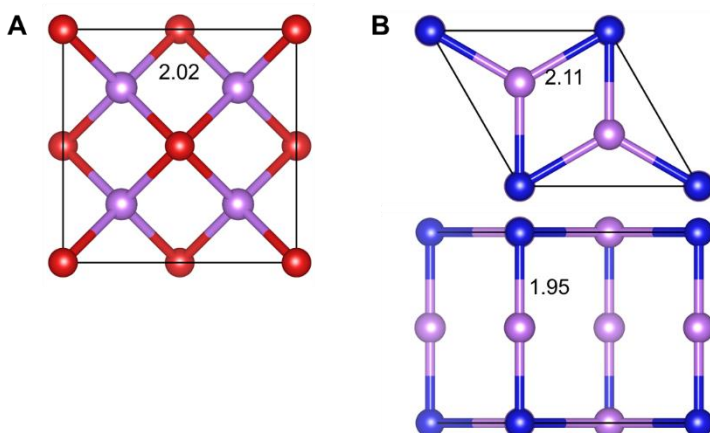

**Fig. S9. The optimized crystal structures of  $\text{Li}_2\text{O}$  and  $\text{Li}_3\text{N}$ .** The optimized crystal structures of (A)  $\text{Li}_2\text{O}$  and (B)  $\text{Li}_3\text{N}$  (top: top view; bottom: side view). The Li–O/N bond length is marked with black numbers. The lithium, nitrogen, and oxygen atoms are marked with purple, blue, and red, respectively.

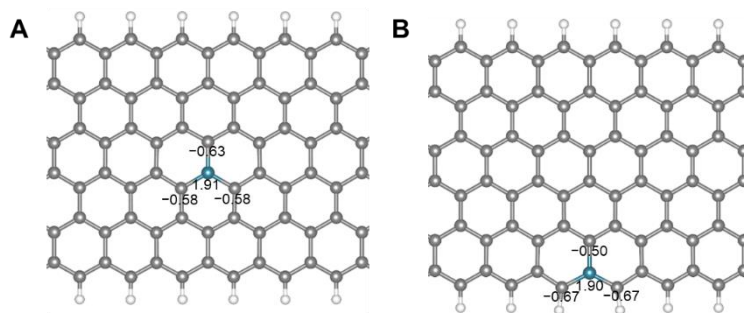

**Fig. S10. The Bader charge analyses of bgB- and egB-GNRs.** The Bader charge (marked with black numbers) analyses of (A) bgB and (B) egB. The hydrogen, boron, and carbon atoms are marked as white, green, and gray, respectively.

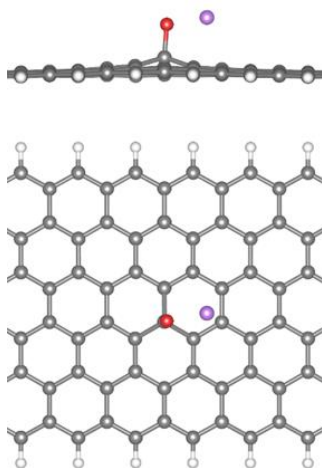

**Fig. S11. The optimized interaction geometry of a Li atom interacts with eO-GNR.** Top: side view; Bottom: top view. The pristine C–O–C bond was destroyed by the adsorbed Li atom. The hydrogen, lithium, carbon, and oxygen atoms are marked as white, purple, gray, and red, respectively.



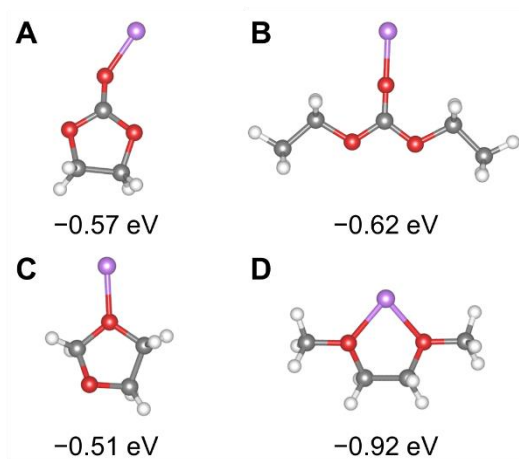

**Fig. S12.** The optimized structures and binding energies between a Li atom and a solvent molecule. (A) EC, (B) DEC, (C) DOL, and (D) DME.

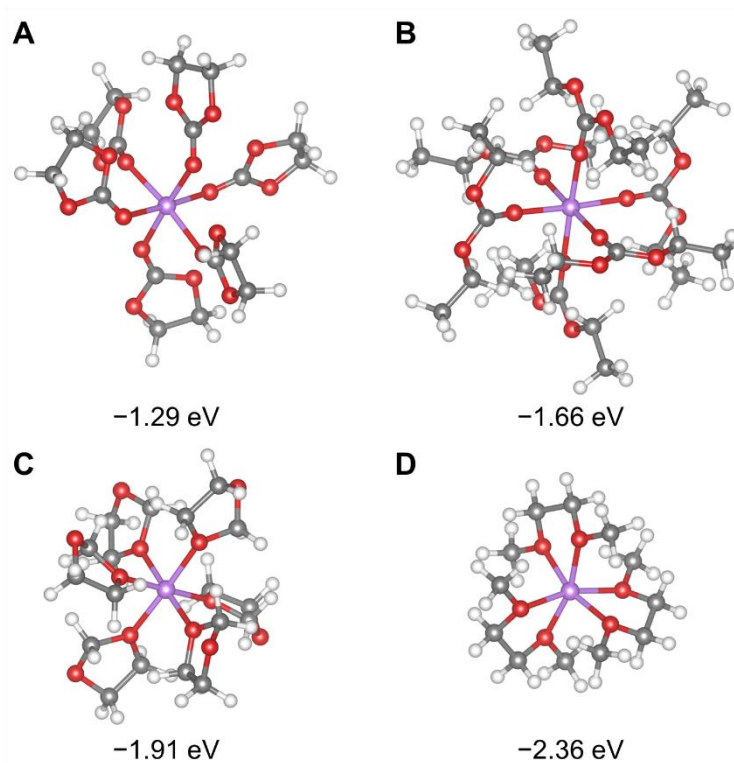

**Fig. S13.** The optimized structures and binding energies between a Li atom and a multisolvant molecule. (A) EC, (B) DEC, (C) DOL, and (D) DME.

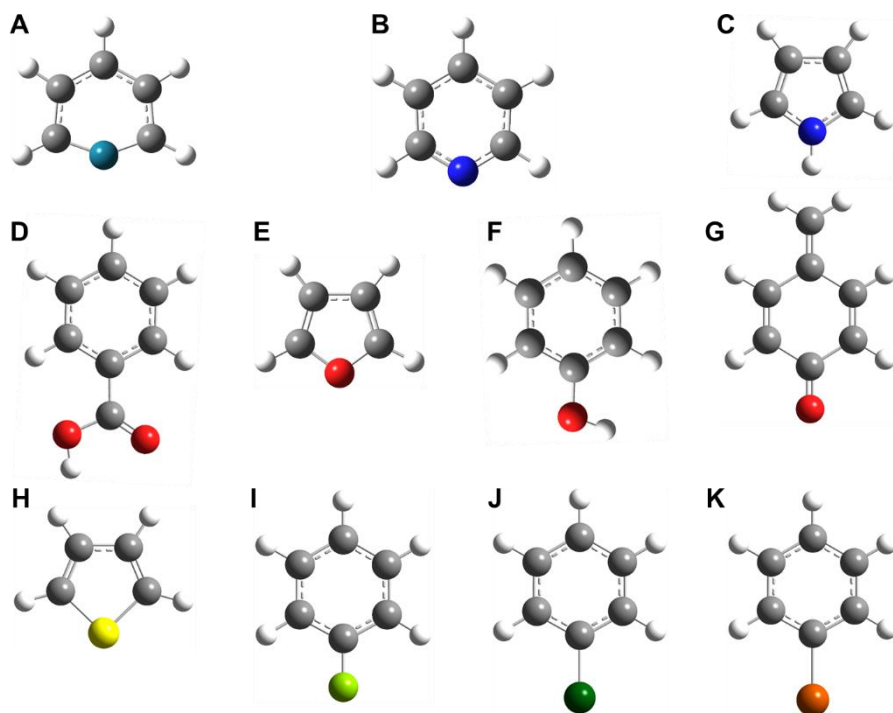

**Fig. S14. The optimized structures of borabenzene, pyridine, pyrrole, benzoic acid, furan, phenol, quinomethan, thiophene, fluorobenzene, chlorobenzene, and bromobenzene molecules.** The optimized structures of (A) borabenzene, (B) pyridine, (C) pyrrole, (D) benzoic acid, (E) furan, (F) phenol, (G) quinomethan, (H) thiophene, (I) fluorobenzene, (J) chlorobenzene, and (K) bromobenzene molecules. The hydrogen, boron, carbon, nitrogen, oxygen, fluorine, sulfur, chlorine, and bromine atoms are marked as white, green, gray, blue, red, cyan, yellow, bottle green, and orange, respectively.

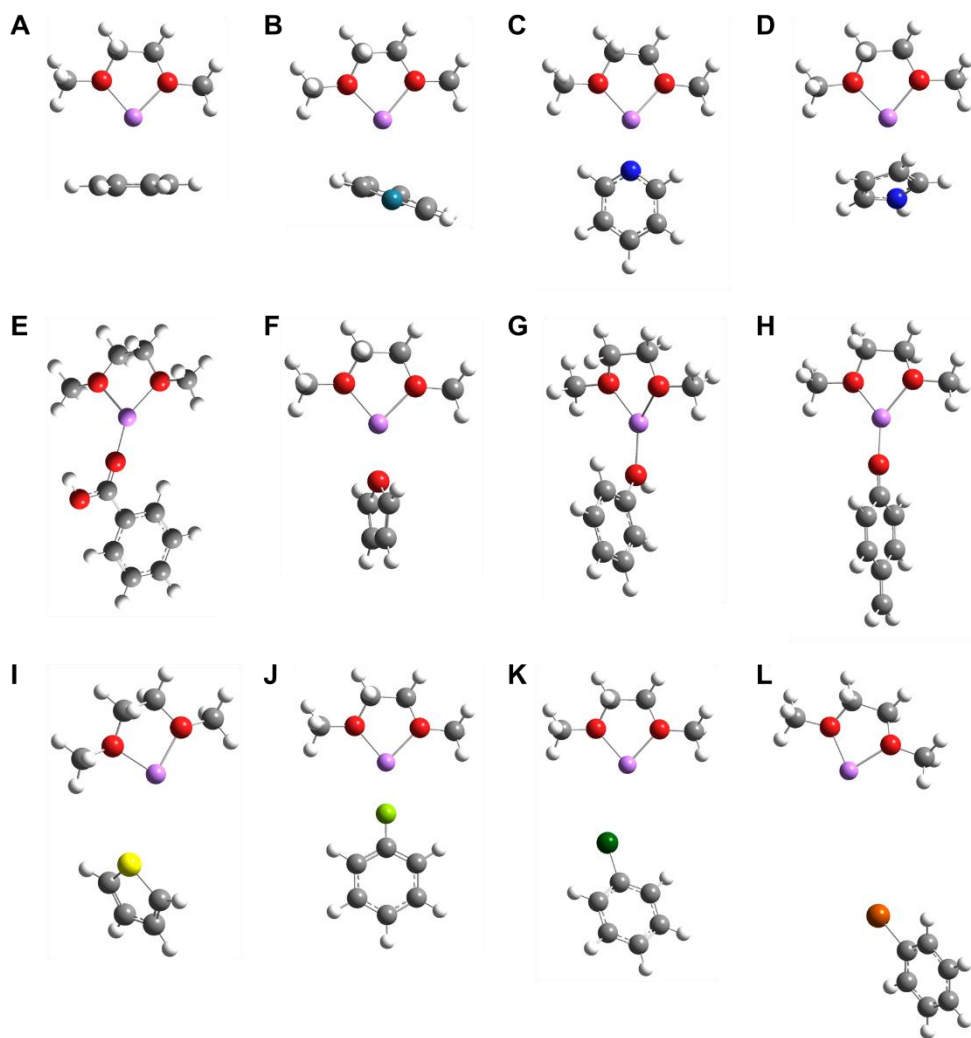

**Fig. S15.** The optimized interaction geometries of  $\text{Li}^+$ -DME complex and borabenzene, pyridine, pyrrole, benzoic acid, furan, phenol, quinomethan, thiophene, fluorobenzene, chlorobenzene, and bromobenzene molecules. The optimized interaction geometries of  $\text{Li}^+$ -DME complex and (A) benzene, (B) borabenzene, (C) pyridine, (D) pyrrole, (E) benzoic acid, (F) furan, (G) phenol, (H) quinomethan, (I) thiophene, (J) fluorobenzene, (K) chlorobenzene, and (L) bromobenzene molecules. The hydrogen, lithium, boron, carbon, nitrogen, oxygen, fluorine, sulfur, chlorine, and bromine atoms are marked as white, purple, green, gray, blue, red, cyan, yellow, bottle green, and orange, respectively.

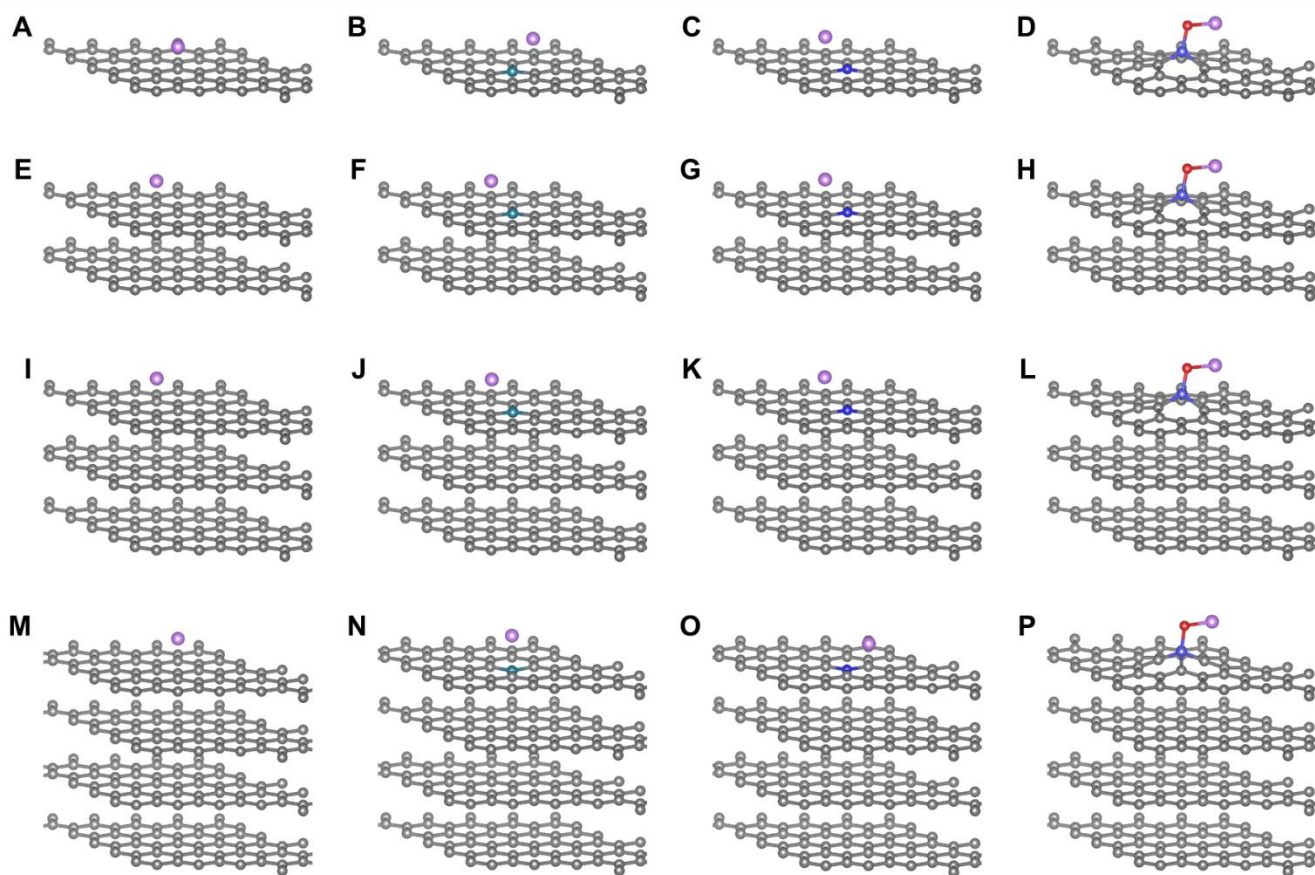

**Fig. S16. The optimized interaction geometry of a Li atom and single-/multilayered graphene and graphite. (A)** Single-layered graphene and single-layered graphene with (B) bgB, (C) bqN, and (D) P dopant. (E) Bi-layered graphene and bi-layered graphene with (F) bgB, (G) bqN, and (H) P dopant. (I) Triple-layered graphene and triple-layered graphene with (J) bgB, (K) bqN, and (L) P dopant. (M) Graphite and graphite with (N) bgB, (O) bqN, and (P) P dopant. The hydrogen, lithium, boron, carbon, nitrogen, oxygen, and phosphorus atoms are marked as white, purple, green, gray, blue, red, and wathet, respectively.

Herein, 2D periodic graphene models rather than GNR models were used to investigate the effects of the number of graphene layer as multi-layered GNR models are very complicated. The binding energy of lithium on 2D single-layered graphene ( $-1.15$  eV) is smaller than that on pure GNR ( $-1.91$  eV) due to edge effects. The bgB and bqN decorations were selected as representatives of single doping that enhances and weakens the interaction between graphene and lithium, respectively. Besides, P/O co-doping is selected as the representative of co-doping models.

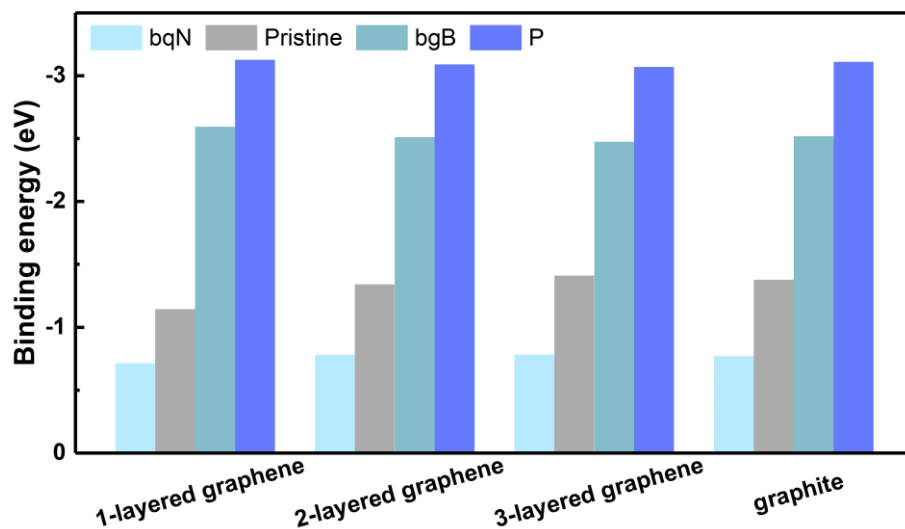

Fig. S17. A summary of calculated binding energy between a Li atom and single/multilayered graphene and graphite.

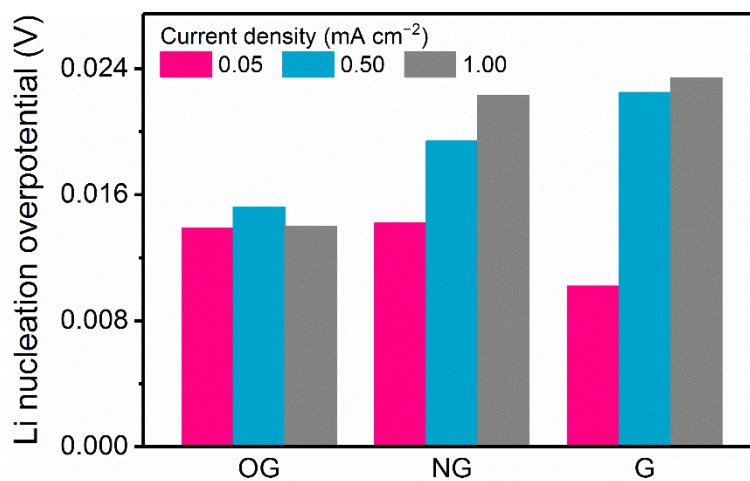

Fig. S18. The Li nucleation overpotentials on G, NG, and OG electrodes at different current densities (0.05, 0.50, and 1.00 mA cm<sup>-2</sup>).

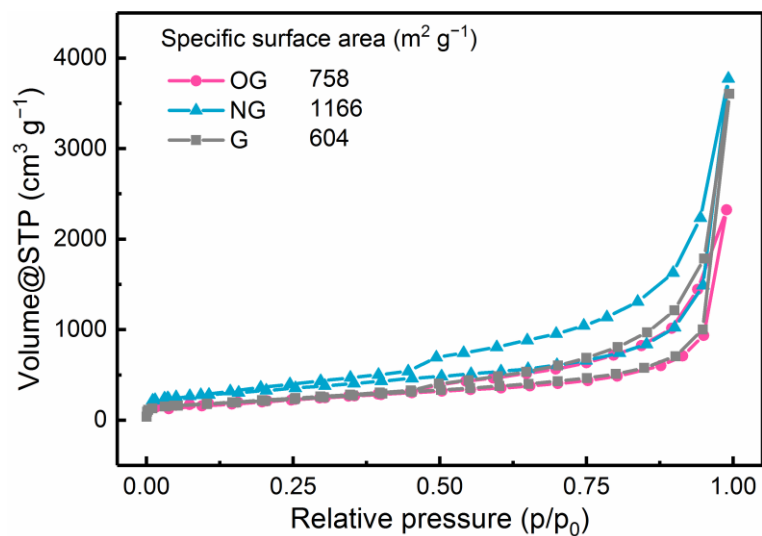

Fig. S19. The N<sub>2</sub> isotherms of OG, NG, and G materials.

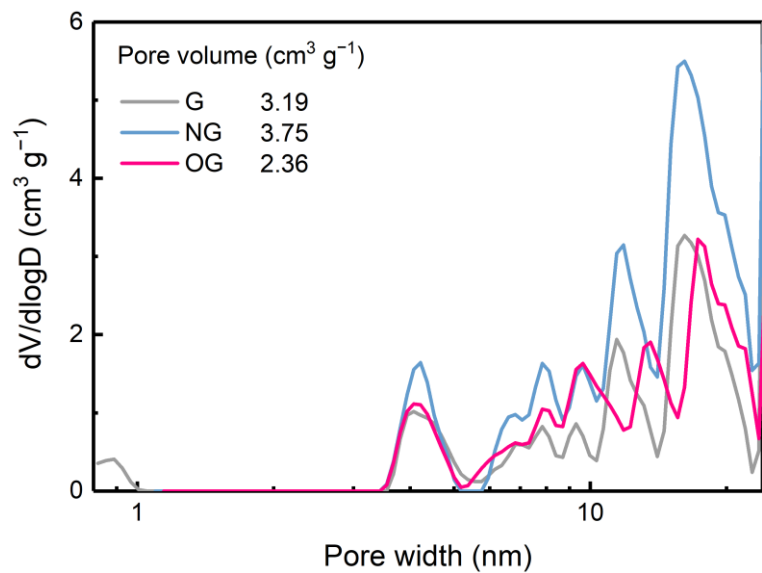

Fig. S20. The pore size distribution derived from the N<sub>2</sub> isothermal adsorption plot of OG, NG, and G materials.

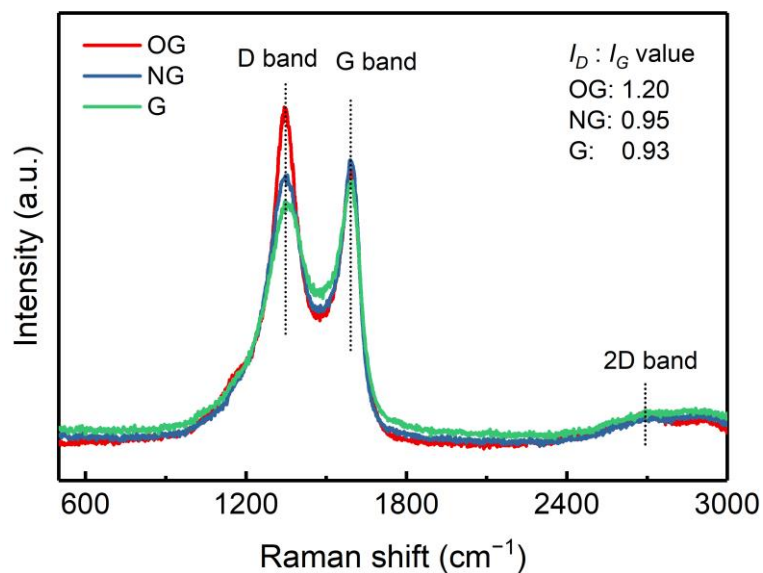

Fig. S21. The Raman spectra of OG, NG, and G materials.

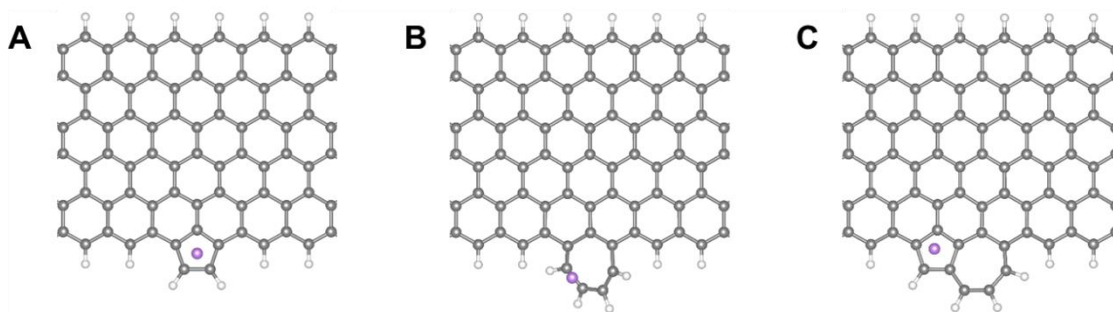

Fig. S22. The optimized interaction geometry of Li atom on GNR with C5, C7, and C5+C7 defects. The optimized interaction geometry of Li atom on GNR with (A) C5, (B) C7, and (C) C5+C7 defects, respectively. The hydrogen, lithium, and carbon atoms are marked as white, purple, and gray, respectively.

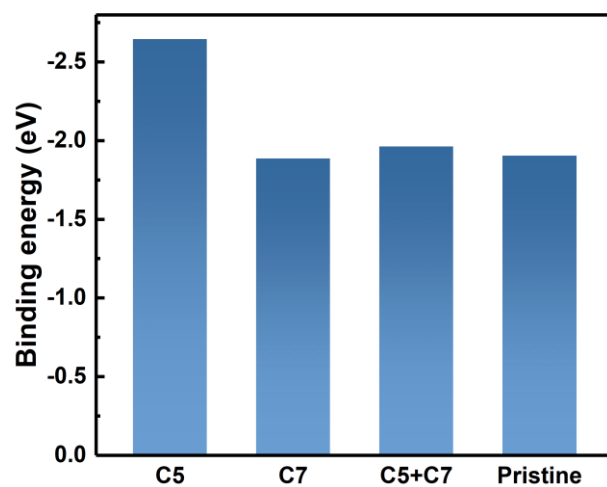

Fig. S23. The summary of binding energy of a Li atom adsorbed on GNR with C5, C7, and C5 + C7 defects.

## 2. Supplementary Tables

Table S1. A summary of binding energy between nanoribbons and a Li atom.

| Type of GNR | Binding energy (eV) |
|-------------|---------------------|
| egB         | -2.54               |
| bgB         | -2.59               |
| oB          | -3.59               |
| bqN         | -1.17               |
| eqN         | -1.30               |
| rN          | -1.39               |
| pN          | -2.40               |
| cO          | -1.04               |
| eO          | -1.64               |
| hO          | -1.91               |
| kO          | -2.35               |
| aO          | -2.86               |
| F           | -0.83               |
| Cl          | -0.48               |
| Br          | -0.45               |
| I           | -0.84               |
| P           | -3.14               |
| S           | -0.57               |
| oS          | -2.60               |
| pristine    | -1.91               |



**Table S2. A summary of Li binding energy on Li (100) and (110) surfaces and total energy per bulk lithium.**

| Energy (eV) | Li (100) | Li (110) | Bulk lithium |
|-------------|----------|----------|--------------|
|             | -1.33    | -1.41    | -1.90        |

**Table S3. A summary of local dipole in heteroatom-doped nanoribbons.**

| Type of GNR | Local dipole ( $e^- \text{ \AA}$ ) |
|-------------|------------------------------------|
| egB         | 1.90                               |
| bgB         | 1.66                               |
| oB          | 3.21                               |
| bqN         | 0.60                               |
| eqN         | 0.66                               |
| rN          | 0.57                               |
| pN          | 0.64                               |
| cO          | 0.63                               |
| hO          | 0.85                               |
| kO          | 1.11                               |
| aO          | 2.00                               |
| F           | 0.38                               |
